# Supplementary material for: Chronic Fatigue, Physical Impairments and Quality of Life in Women with Endometriosis: A Case-Control Study
Source: PubMed Central journal article supplement (PMC7277433; doi:10.3390/ijerph17103610), 2020-05-21
Supplement: ijerph-17-03610-s001.pdf [file ijerph-17-03610-s001.pdf]

**Supplementary Table 1.** Health-related fitness in healthy women and affected women with low fatigued and fatigued.

|                                    | Control Group ( <i>n</i> = 25)   | ENDO Group ( <i>n</i> = 25)     |                                 | <i>p</i> -trend |
|------------------------------------|----------------------------------|---------------------------------|---------------------------------|-----------------|
|                                    |                                  | Low Fatigue ( <i>n</i> = 13)    | Fatigued ( <i>n</i> = 12)       |                 |
| Dynamometry                        |                                  |                                 |                                 |                 |
| Back dynamometer                   | 63.20 ± 11.40<br>58.26–68.12)    | 53.33 ± 12.21<br>45.95–60.71)   | 51.03 ± 17.43<br>39.95–62.10    | 0.004           |
| Hand dynamometer, dominant side    | 26.50 ± 4.00<br>24.53–27.46)     | 26.15 ± 4.92<br>23.38–29.32     | 25.89 ± 4.69<br>22.90–28.87     | 0.688           |
| Hand dynamometer, nondominant side | 25.20 ± 3.90<br>23.35–26.01)     | 23.59 ± 5.65<br>20.17–27.00     | 24.67 ± 4.40<br>21.88–27.47     | 0.470           |
| Lumbar spine flexibility           |                                  |                                 |                                 |                 |
| Schöeber test (cm)                 | 15.00 ± 1.09<br>14.48–15.46)     | 14.31 ± 0.93<br>13.75–14.87)    | 13.96 ± 1.20<br>13.20–14.72     | 0.008           |
| Flamingo test                      | 0.02 ± 0.10<br>–0,02–0.07)       | 0.19 ± 0.33<br>0.00–0.39        | 0.17 ± 0.33<br>–0.04–0.37       | 0.039           |
| 6-min walking test (m)             | 651.20 ± 54.30<br>624.42–672.71) | 571.85 ± 65.51<br>532.26–611.43 | 549.75 ± 48.50<br>518.94–580.56 | <0.001          |

Values are expressed as mean ± standard deviation (95% confidence intervals for the mean).

**Supplementary Table 2.** Perceived physical fitness, sleep quality and quality of life in healthy women and affected women with low fatigued and fatigued.

|                            | Control Group ( <i>n</i> = 25) | ENDO Group ( <i>n</i> = 25)  |                           | <i>p</i> -trend |
|----------------------------|--------------------------------|------------------------------|---------------------------|-----------------|
|                            |                                | Low Fatigue ( <i>n</i> = 13) | Fatigued ( <i>n</i> = 12) |                 |
| Physical fitness           |                                |                              |                           |                 |
| Overall fitness            | 3.60 ± 0.65                    | 3.08 ± 0.64                  | 2.30 ± 0.82               | 0.018           |
|                            | 3.31–3.86                      | 2.69–3.46                    | 1.71–2.89                 |                 |
| Cardio-respiratory fitness | 3.25 ± 0.79                    | 2.85 ± 0.80                  | 2.20 ± 0.92               | 0.087           |
|                            | 2.91–3.59                      | 2.36–3.33                    | 1.54–2.86                 |                 |
| Muscular fitness           | 3.63 ± 0.71                    | 3.5 ± 0.5                    | 2.6 ± 1.0                 | 0.018           |
|                            | 3.32–3.93                      | 3.15–3.78                    | 1.91–3.29                 |                 |
| Speed-agility              | 3.71 ± 0.75                    | 3.15 ± 0.38                  | 2.70 ± 0.67               | 0.051           |
|                            | 3.39–4.03                      | 2.93–3.38                    | 2.22–3.18                 |                 |
| Flexibility                | 3.38 ± 0.77                    | 3.15 ± 1.07                  | 3.10 ± 1.10               | 0.870           |
|                            | 3.05–3.70                      | 2.51–3.80                    | 2.31–3.89                 |                 |
| Sleep quality              | 6.00 ± 3.19                    | 6.70 ± 3.47                  | 10.44 ± 3.68              | 0.014           |
|                            | 4.68–7.32                      | 4.22–9.18                    | 7.62–13.27                |                 |
| HRQoL                      |                                |                              |                           |                 |
| Physical health            | 55.09 ± 5.04                   | 44.24 ± 10.0                 | 31.04 ± 13.02             | 0.034           |
|                            | 53.01–57.17                    | 37.09–51.39                  | 21.03–41.05               |                 |
| Mental health              | 49.56 ± 10.54                  | 49.40 ± 9.29                 | 43.00 ± 13.59             | 0.327           |
|                            | 45.21–53.91                    | 42.75–56.04                  | 32.55–53.44               |                 |

Values are expressed as mean ± standard deviation (95% confidence intervals for the mean).
